# Supplementary material
Source: MDPI journal article supplement (https://www.mdpi.com/2073-4433/10/3/106)
Supplement: s1 [file s1]

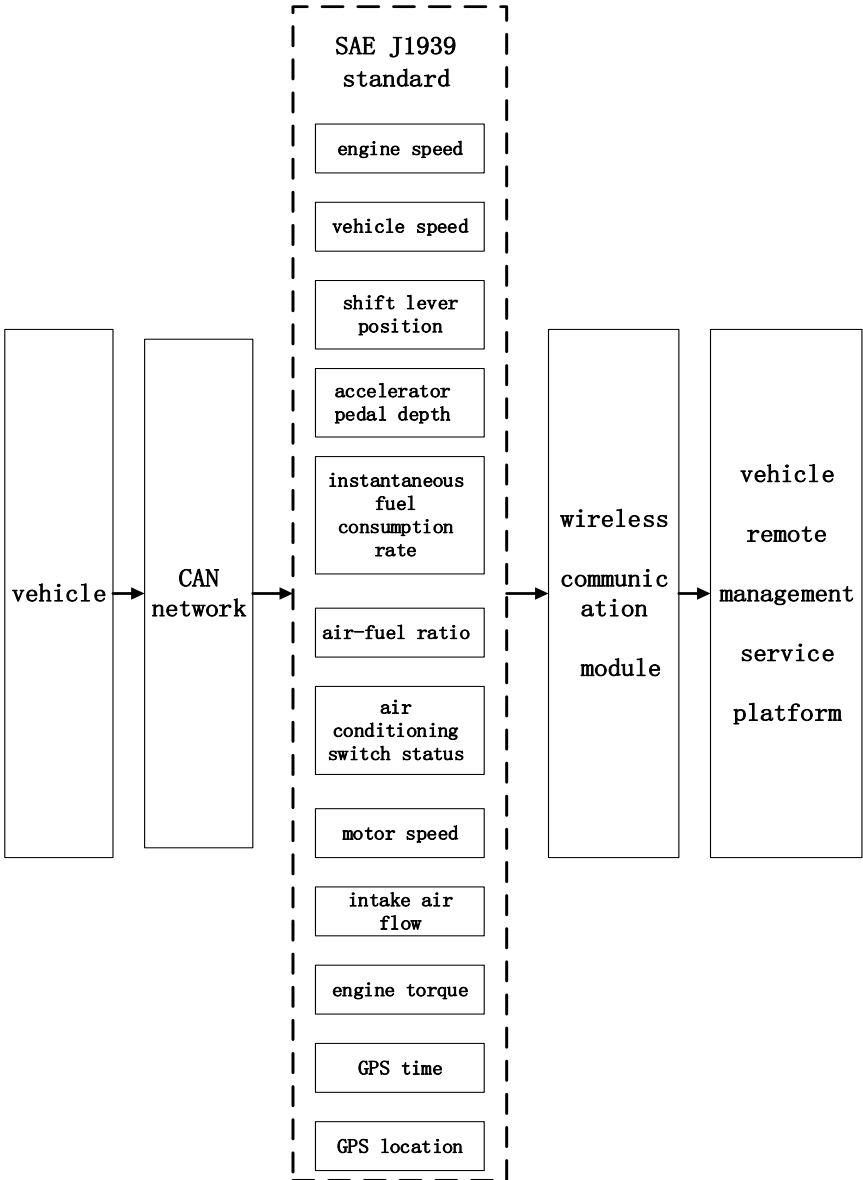

Figure S1. Road test remote information system and data analysis process.

**Table S1.** Environmental information.

| Month     | Min Temperature (°C) | Max Temperature (°C) | Humidity (%) |
|-----------|----------------------|----------------------|--------------|
| January   | 14                   | 26                   | 59           |
| February  | 12                   | 32                   | 61           |
| March     | 15                   | 32                   | 61           |
| April     | 17                   | 36                   | 64           |
| May       | 24                   | 36                   | 80           |
| June      | 25                   | 37                   | 83           |
| July      | 25                   | 35                   | 89           |
| August    | 25                   | 36                   | 75           |
| September | 25                   | 35                   | 70           |
| October   | 19                   | 32                   | 74           |
| November  | 16                   | 30                   | 77           |
| December  | 11                   | 24                   | 61           |

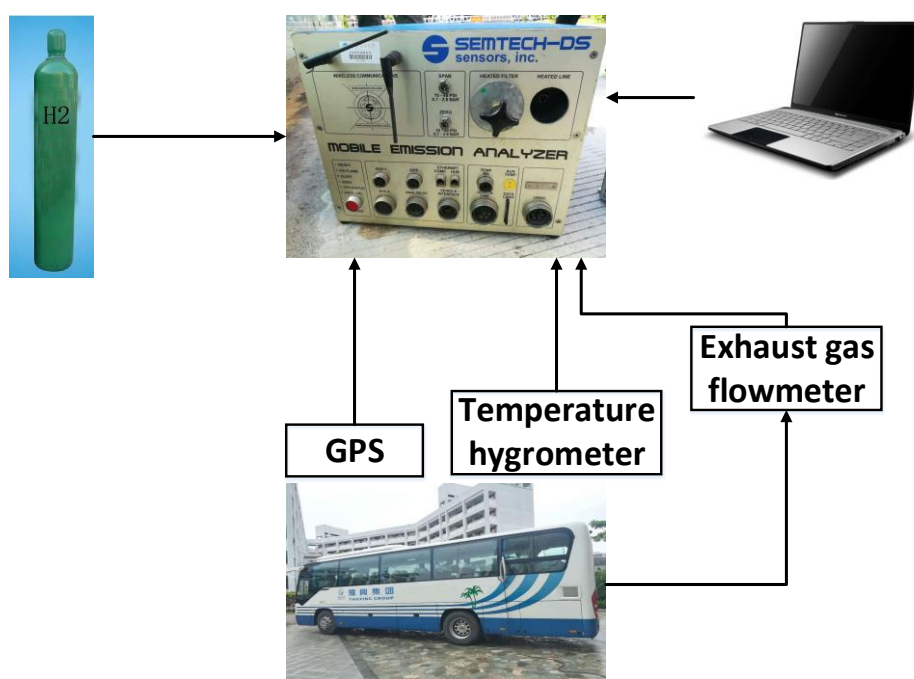

**Figure S2.** Portable emission measurement system schematic.

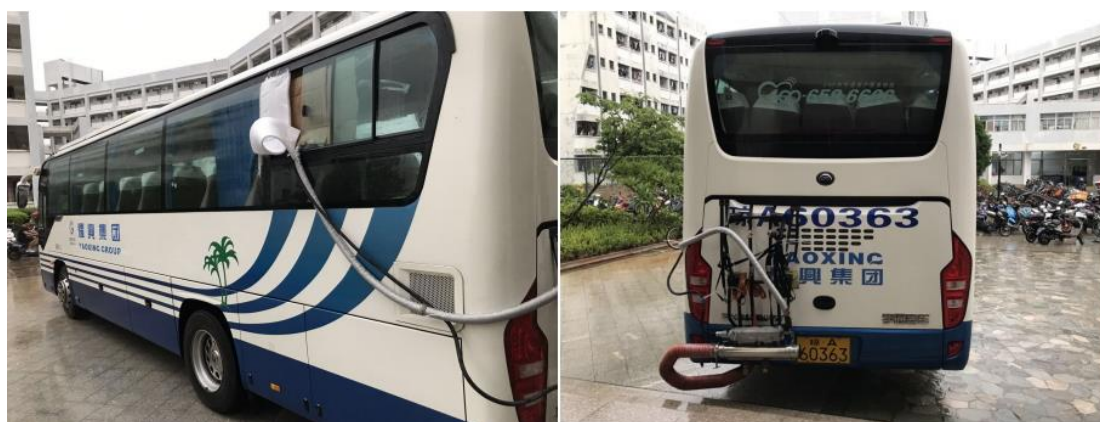

**Figure S3.** Portable emission measurement system installation and location.

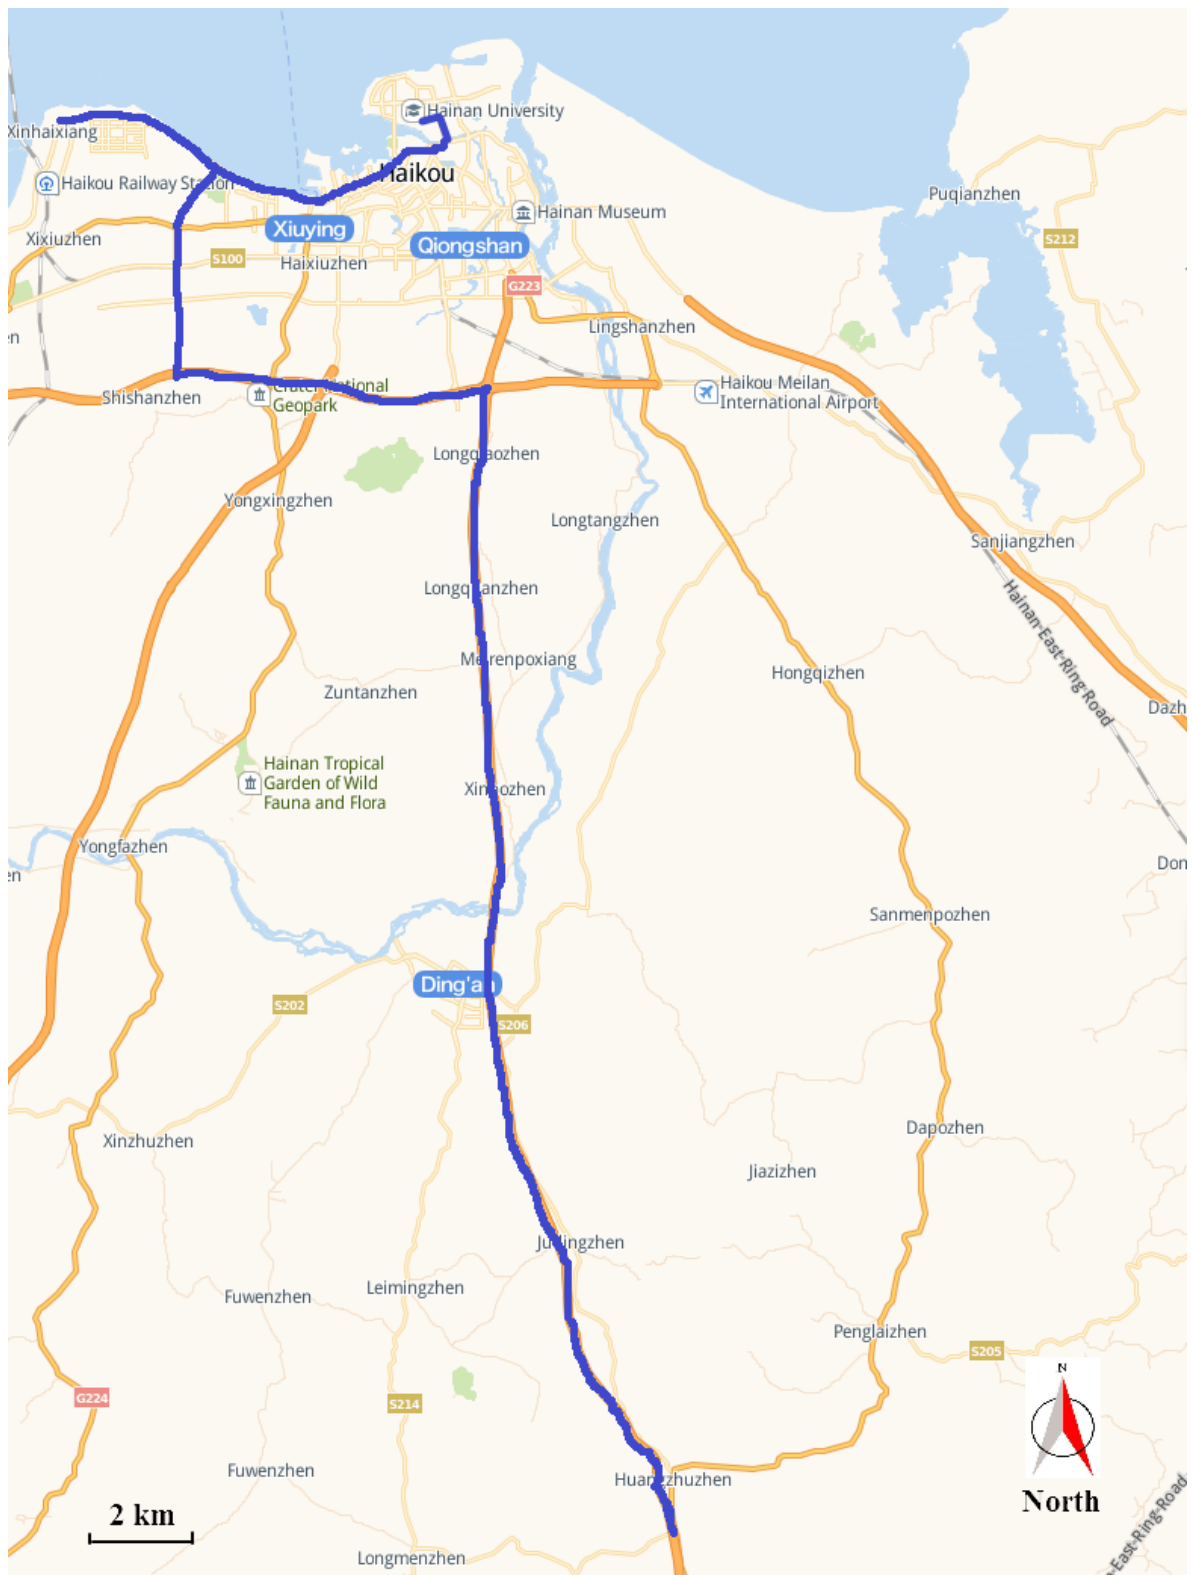

Figure S4. Test route.
